# Supplementary material for: Synthesis of SnO2/MoS2composites with different component ratios and their applications as lithium ion battery anodes
Source: Royal Society of Chemistry journal article supplement (doi:10.1039/c4ta03770g), 2014-09-04
Supplement: c4ta03770g1.pdf [file c4ta03770g1.pdf]

Supporting information of  
**Synthesis of SnO<sub>2</sub>/MoS<sub>2</sub> composites with Different  
Component Ratios and their Applications as Lithium Ion  
Battery Anodes**

*Yu Chen,<sup>a\*</sup> Jia Lu,<sup>b</sup> Shi Wen,<sup>a</sup> Li Lu,<sup>b</sup> and Junmin Xue<sup>a\*</sup>*

<sup>a</sup>Department of Materials Science and Engineering,

National University of Singapore, Singapore, 117576

E-mail: msexuejm@nus.edu.sg, msecheyu@nus.edu.sg

<sup>b</sup>Department of Mechanical Engineering,

National University of Singapore, Singapore, 117576

| Sample Name                              | ICP Measured Value |          | Calculated Value |         | Component              |                        |
|------------------------------------------|--------------------|----------|------------------|---------|------------------------|------------------------|
|                                          | Sn (wt%)           | Mo (wt%) | O (wt%)          | S (wt%) | SnO <sub>2</sub> (wt%) | MoS <sub>2</sub> (wt%) |
| <i>MoS<sub>2</sub></i>                   | -                  | 55.63    | -                | 37.18   | -                      | 92.82                  |
| <i>SnO<sub>2</sub>/MoS<sub>2</sub>-1</i> | 22.90              | 36.01    | 6.17             | 24.06   | 29.07                  | 60.06                  |
| <i>SnO<sub>2</sub>/MoS<sub>2</sub>-2</i> | 33.93              | 26.53    | 9.15             | 17.7    | 43.08                  | 44.27                  |
| <i>SnO<sub>2</sub>/MoS<sub>2</sub>-3</i> | 43.79              | 17.22    | 11.81            | 11.51   | 55.60                  | 28.73                  |
| <i>SnO<sub>2</sub>/MoS<sub>2</sub>-4</i> | 50.75              | 9.94     | 13.68            | 6.64    | 64.43                  | 16.58                  |

Figure S1. ICP analysis of atomic percentages of pure MoS<sub>2</sub> and various SnO<sub>2</sub>/ MoS<sub>2</sub> composites.

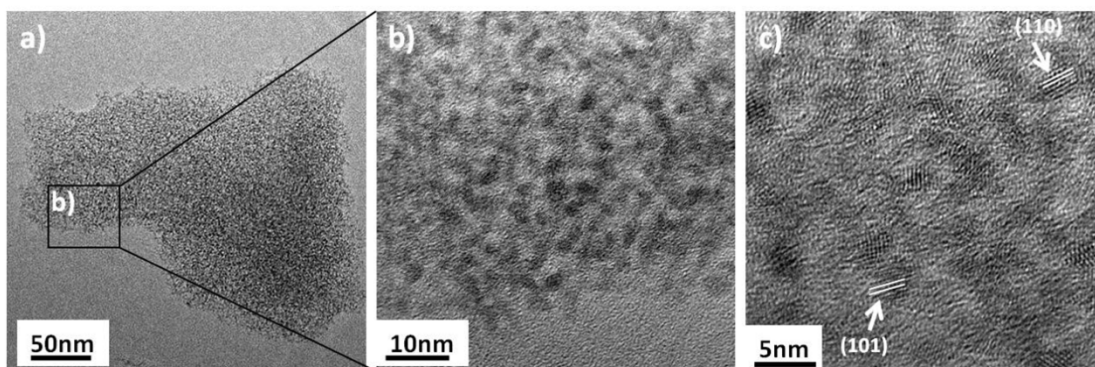

Figure S2. TEM images of SnO<sub>2</sub> nanoparticles under different magnifications.

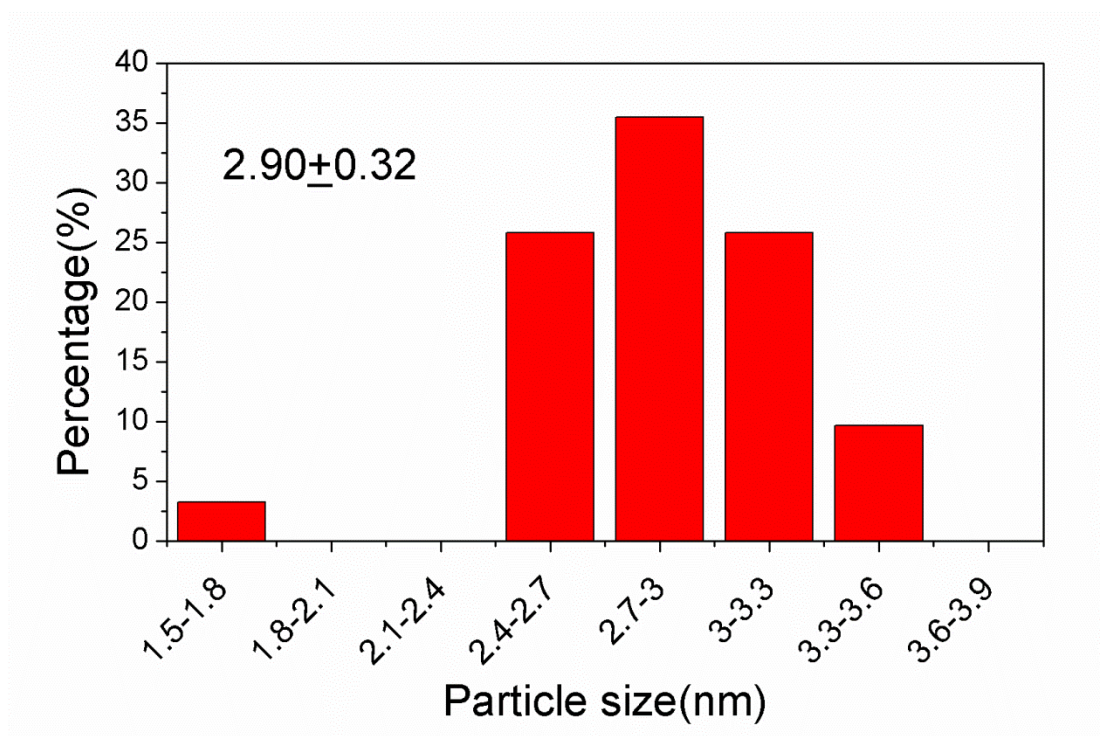

Figure S3. Size distribution of SnO<sub>2</sub> nanoparticles from SnO<sub>2</sub>/MoS<sub>2</sub> composites.

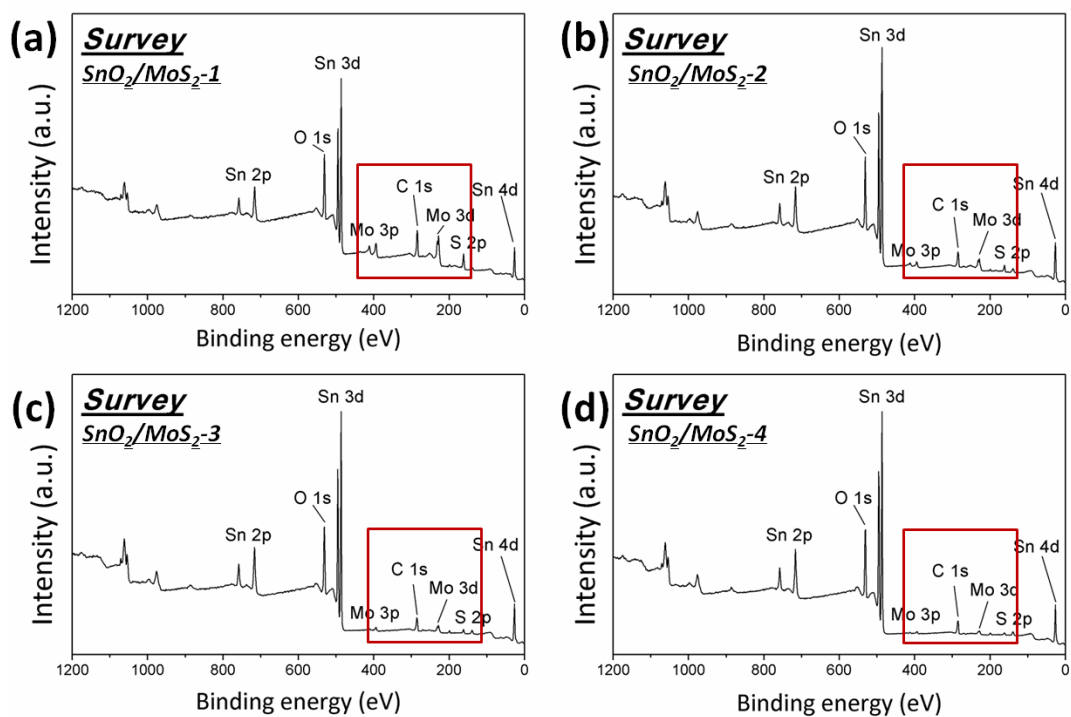

Figure S4. XPS survey spectra of (a)  $\text{SnO}_2/\text{MoS}_2$ -1, (b)  $\text{SnO}_2/\text{MoS}_2$ -2, (c)  $\text{SnO}_2/\text{MoS}_2$ -3, and (d)  $\text{SnO}_2/\text{MoS}_2$ -4.

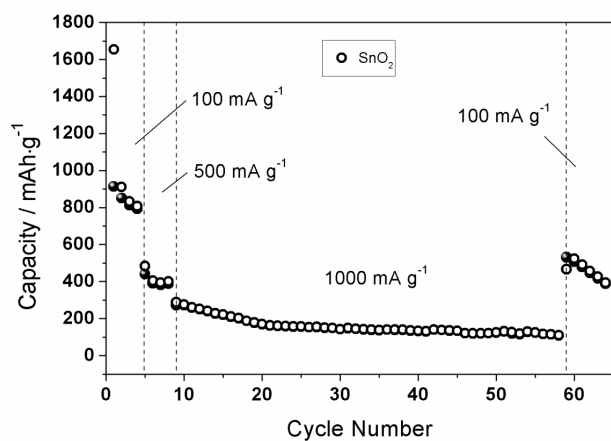

Figure S5. Electrochemical performance of pristine  $\text{SnO}_2$  nanoparticles.

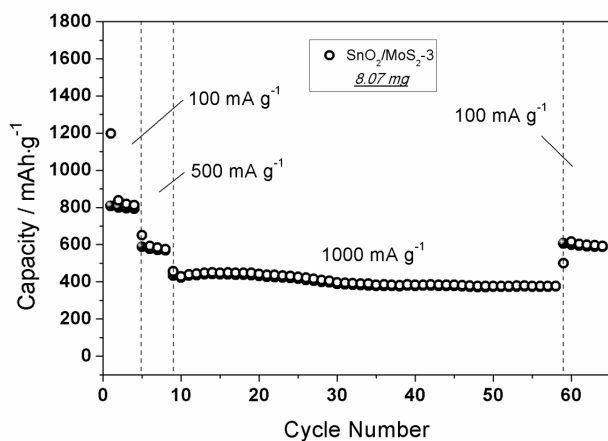

Figure S6. Electrochemical performance of SnO<sub>2</sub>/MoS<sub>2</sub>-3 with high loading amount.

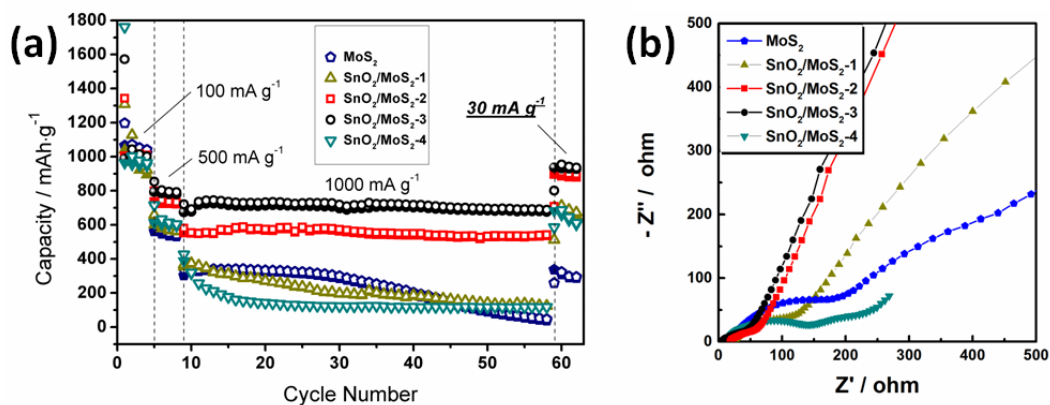

Figure S7 (a) Electrochemical behaviors and (b) corresponding Nyquist plots of all four composites and pure MoS<sub>2</sub> nanosheets when the current density returned to a lower value of 30 mA g<sup>-1</sup> at 59<sup>th</sup> cycle.

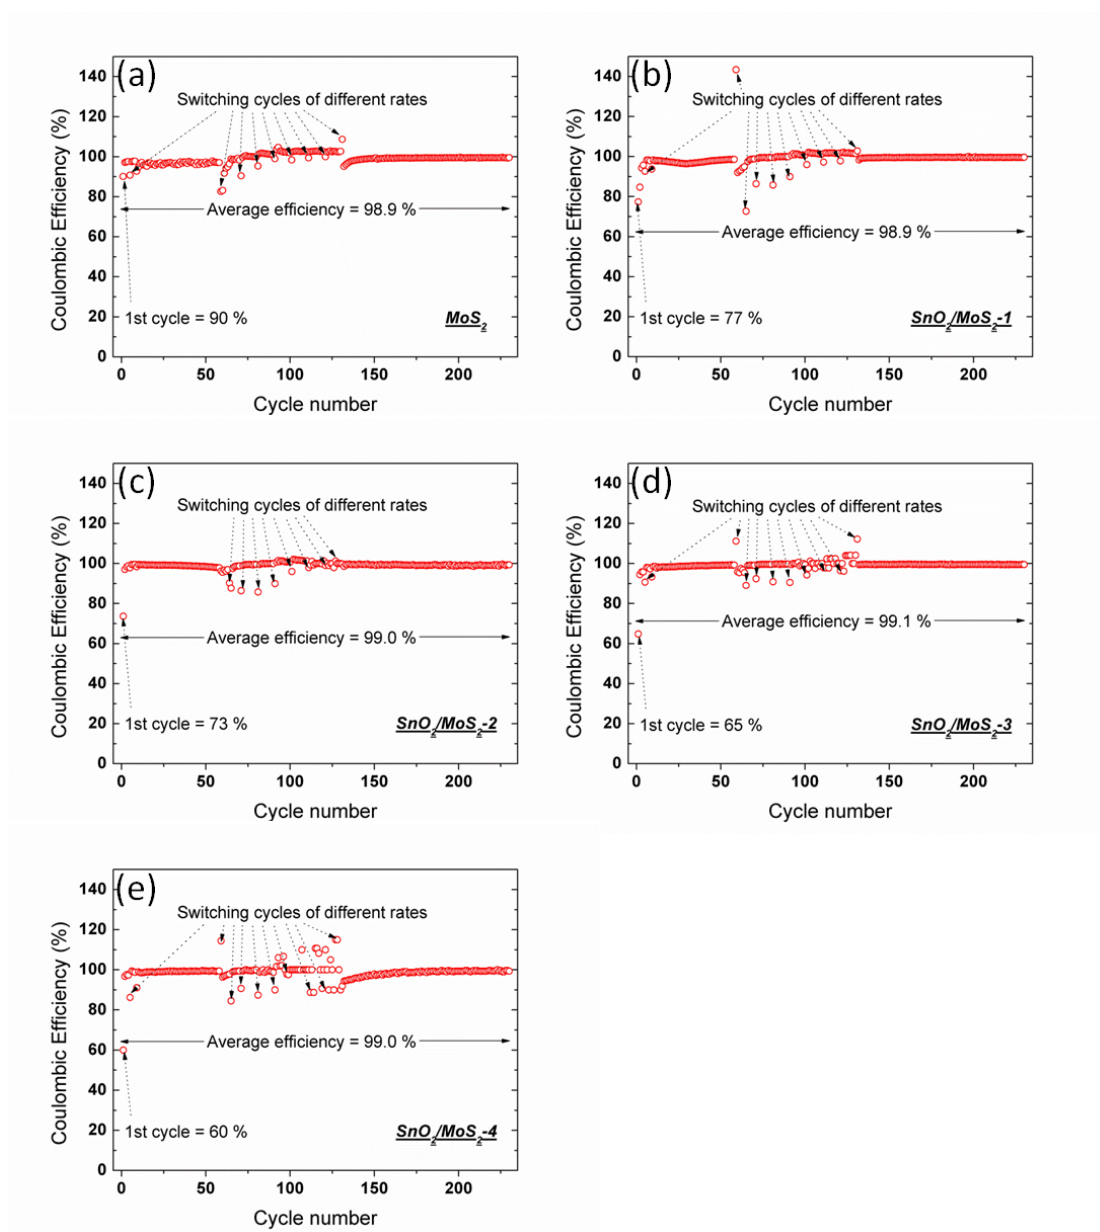

Figure S8. Coulombic efficiencies of a)  $\text{MoS}_2$ , b)  $\text{SnO}_2/\text{MoS}_2$ -1, c)  $\text{SnO}_2/\text{MoS}_2$ -2, d)  $\text{SnO}_2/\text{MoS}_2$ -3, and e)  $\text{SnO}_2/\text{MoS}_2$ -4.

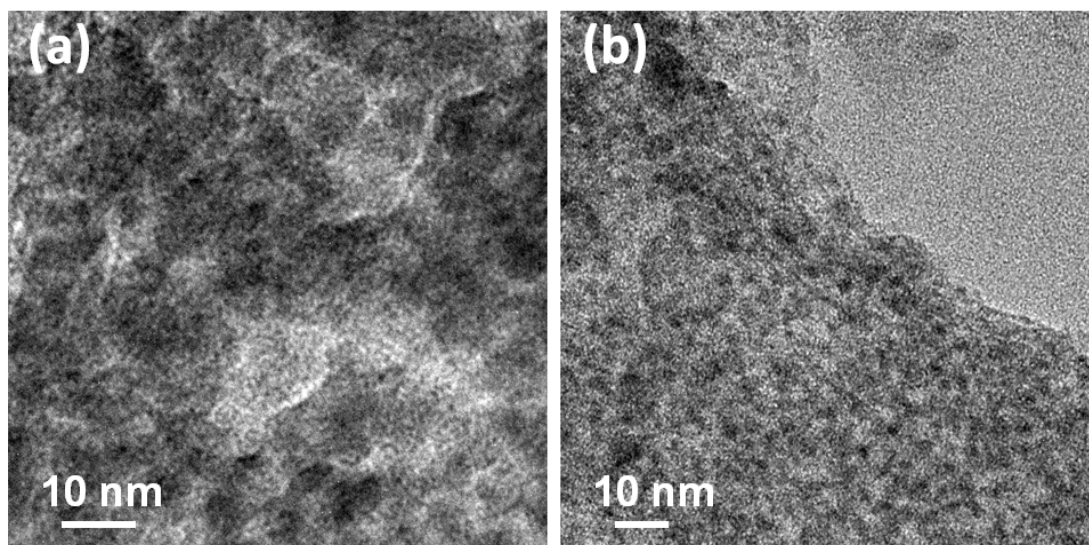

Figure S9. TEM images of (a) MoS<sub>2</sub> nanosheets and (b) SnO<sub>2</sub>/MoS<sub>2</sub>-3 composite after electrochemical tests.

| Anodes                                                                                                                       | SnO <sub>2</sub> /MoS <sub>2</sub> -3 | SL-MoS <sub>2</sub> -GNS02 | MoS <sub>2</sub> /G/PEO | SnO <sub>2</sub> /G | 3D Sn-G          |
|------------------------------------------------------------------------------------------------------------------------------|---------------------------------------|----------------------------|-------------------------|---------------------|------------------|
| <b>Initial capacity</b><br>capacity @ current density<br>(mAh g <sup>-1</sup> @mA g <sup>-1</sup> )                          | 979<br>@100                           | 912<br>@100                | 730<br>@100             | 978<br>@67          | 1081<br>@293     |
| <b>Rate capability</b><br>capacity @ current density<br>(mAh g <sup>-1</sup> @mA g <sup>-1</sup> )                           | 658<br>@1000                          | 571<br>@1000               | 500<br>@1000            | 400<br>@1000        | 460<br>@879      |
| <b>Cyclic Stability</b><br>Capacity change (cycle<br>number) @ current density<br>(mAh g <sup>-1</sup> @mA g <sup>-1</sup> ) | +18(100)<br>@1000                     | ~-30(55)<br>@100           | ~-20(5)<br>@1000        | -200 (50)<br>@100   | +6(4000)<br>@879 |
| Reference                                                                                                                    | This work                             | [23]                       | [33]                    | [34]                | [35]             |

Figure S10. Comparison of electrochemical performance of SnO<sub>2</sub>/MoS<sub>2</sub>-3 and those of similar works in literature.
